# Supplementary material
Source: PubMed Central journal article supplement (PMC384762)

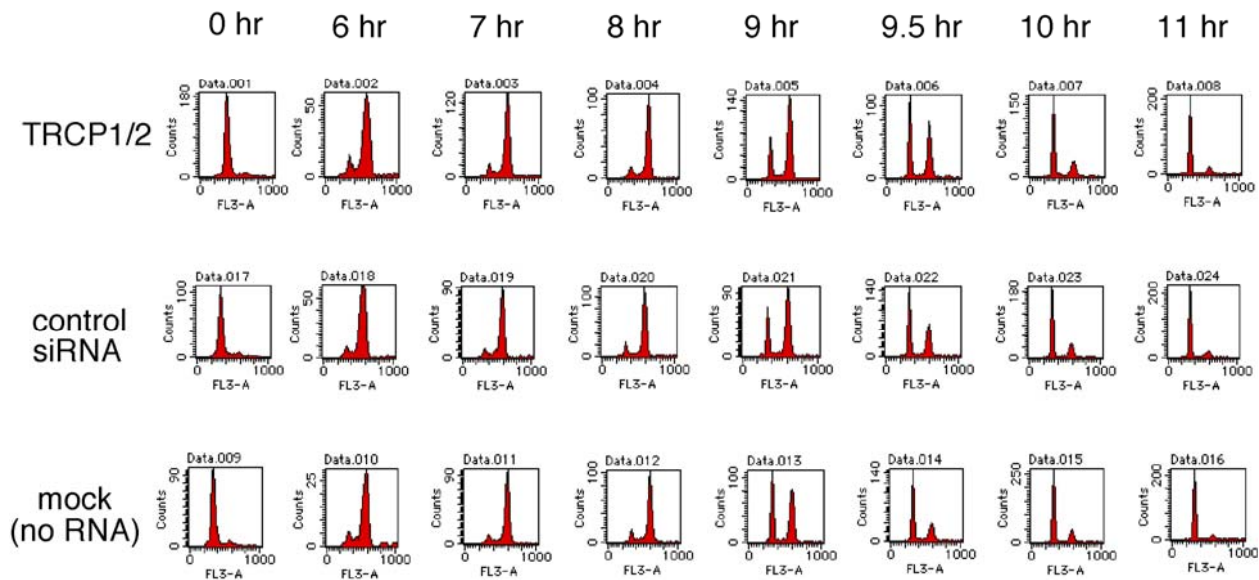

Supplement: pnas_101_13_4419__4.pdf [file pnas_101_13_4419__4.pdf]
